Sequence analysis

# HIITE: HIV-1 incidence and infection time estimator

Sung Yong Park<sup>1</sup>, Tanzy M. T. Love<sup>2</sup>, Shivankur Kapoor<sup>1</sup> and Ha Youn Lee<sup>1,\*</sup>

<sup>1</sup>Department of Molecular Microbiology and Immunology, Keck School of Medicine, University of Southern California, CA 90089, USA and <sup>2</sup>Department of Biostatistics and Computational Biology, University of Rochester School of Medicine and Dentistry, Rochester, NY 14642, USA

\*To whom correspondence should be addressed.

Associate Editor: John Hancock

Received on September 1, 2017; revised on January 25, 2018; editorial decision on February 7, 2018; accepted on February 8, 2018

## Abstract

**Motivation:** Around 2.1 million new HIV-1 infections were reported in 2015, alerting that the HIV-1 epidemic remains a significant global health challenge. Precise incidence assessment strengthens epidemic monitoring efforts and guides strategy optimization for prevention programs. Estimating the onset time of HIV-1 infection can facilitate optimal clinical management and identify key populations largely responsible for epidemic spread and thereby infer HIV-1 transmission chains. Our goal is to develop a genomic assay estimating the incidence and infection time in a single cross-sectional survey setting.

**Results:** We created a web-based platform, HIV-1 incidence and infection time estimator (HIITE), which processes envelope gene sequences using hierarchical clustering algorithms and informs the stage of infection, along with time since infection for incident cases. HIITE's performance was evaluated using 585 incident and 305 chronic specimens' envelope gene sequences collected from global cohorts including HIV-1 vaccine trial participants. HIITE precisely identified chronically infected individuals as being chronic with an error less than 1% and correctly classified 94% of recently infected individuals as being incident. Using a mixed-effect model, an incident specimen's time since infection was estimated from its single lineage diversity, showing 14% prediction error for time since infection. HIITE is the first algorithm to inform two key metrics from a single time point sequence sample. HIITE has the capacity for assessing not only population-level epidemic spread but also individual-level transmission events from a single survey, advancing HIV prevention and intervention programs.

**Availability and implementation:** Web-based HIITE and source code of HIITE are available at <http://www.hayounlee.org/software.html>.

**Contact:** hayoun@usc.edu

**Supplementary information:** [Supplementary data](#) are available at *Bioinformatics* online.

## 1 Introduction

HIV incidence quantifies newly infected individuals, making it a key metric for monitoring the epidemic's trend and guiding proper resource distribution (Brookmeyer, 1991). Furthermore, the efficacy of an HIV prevention/intervention trial can be evaluated by measuring the incidence rate difference to select optimal prevention/intervention programs (Busch *et al.*, 2010; Incidence Assay Critical Path

Working Group, 2011; Mastro, 2013). Compared to conventional serologic incidence assays that utilize the readout of HIV-1 specific antibodies (Kassanjee *et al.*, 2014; Kassanjee *et al.*, 2016; Keating *et al.*, 2016), the genomic assay has achieved much higher precision in distinguishing chronic and incident cases (Cousins *et al.*, 2012; Moyo *et al.*, 2016; Park *et al.*, 2011; 2014; Ragonnet-Cronin *et al.*, 2012; Wu *et al.*, 2015). For the first time, this genomic incidence

assay has met the optimal performance standards of false recency rate (FRR)—the proportion of chronically infected individuals being misclassified as recently infected—and mean duration of recent infection (MDRI), average timespan in which subjects are classified as recently infected (Park *et al.*, 2017).

Estimating the onset time of HIV-1 infection is an important task in HIV-1 prevention as it can aid in identifying risk behaviors that lead to transmission. Dating an HIV-1 infection can allow us to detect acute and recent infections, which is beneficial for clinical management including incidence surveillance, antiretroviral therapy (ART) initiation and further transmission prevention. Infection time estimates can be used to infer HIV-1 transmission clusters, which enable us to discover geographic and demographic factors of HIV-1 transmission chains (Brenner *et al.*, 2011). Pinpointing transmission events permits us to monitor and evaluate ongoing prevention efforts. Furthermore, the timing of an infection can be used to identify transmitted viral strains and thereby characterize breakthrough viruses' phenotypes, guiding next-generation vaccine designs.

The analysis of intrahost HIV-1 gene sequence populations has suggested the potential for molecular dating. Many studies have isolated envelope gene sequences from hundreds of early infected individuals and created mathematical models to estimate days post transmission (Keele *et al.*, 2008; Lee *et al.*, 2009). Furthermore, complexity in sequence diversity resulting from multiple founder variants has been interpreted by the shifted Poisson mixture model (SPMM), estimating the time of infection and number of transmitted/founder variants (Love *et al.*, 2016). HIV-1 diversity measured from next-generation sequencing reads was also used to estimate time since infection (Puller *et al.*, 2017).

We developed a single algorithm that will estimate the rate of HIV-1 incidence and approximate the time of transmission for those recently infected patients. This tool, HIV-1 Incidence and Infection Time Estimator (HIITE), is designed to function in a single cross-sectional survey setting, unveiling the epidemic status at both population and individual levels. We evaluated HIITE's performance with 890 incident and chronic specimens collected from global cohorts from Africa, America, Asia and Europe, including HIV-1 vaccine trial participants. HIITE is made public as a web-based platform.

## 2 Materials and methods

### 2.1 Specimen characteristics

Published HIV-1 envelope gene sequences were collected from 297 chronic specimens (Supplementary Table S1), as previously described (Park *et al.*, 2017). All chronic specimens were reported to have a documented HIV infection of at least 2 years. Supplementary Table S1 presents each specimen's minimum duration of infection—days from the first HIV positive date, seroconversion or the first sample collection. A total of 144 chronic specimens with full envelope gene sequences and 297 specimens with envelope gene segments (HXB2 7134-7499) were collected, as marked in Supplementary Table S1.

Supplementary Table S2 presents a total of 283 incident specimens comprised of 252 specimens at Fiebig stages I–V and 31 specimens from the Women's Interagency HIV Study (WIHS) with a documented infection of less than 1 year. The estimated time since infection is 17 [13, 28] days for Fiebig stage I, 22 [18, 34] days for II, 25 [22, 37] days for III, 31 [27, 43] days for IV and 101[71, 154] days for V, with a 95% confidence interval (Fiebig *et al.*, 2003; Lee *et al.*, 2009). The minimum and maximum days post-infection were based on HIV-1 negative and positive test dates for the 31 WIHS specimens.

We compiled 194 previously published serial specimens from 43 subjects. Their first specimens were collected within 6 months of transmission (Fiebig stages I–V). This cohort included 179 incident and 5 chronic specimens for full envelope gene sequences and 186 incident and 8 chronic specimens for envelope gene segments (HXB2 7134-7499; Supplementary Table S3). Supplementary Table S3 presents each specimen's estimated days post infection with a 95% confidence interval.

We analyzed a total of 997 full envelope gene sequences from 116 RV144 HIV vaccine trial participants (49 vaccine and 67 placebo recipients) (Edlefsen *et al.*, 2015; Janes *et al.*, 2015; Rolland *et al.*, 2012). The RV144 trial subject's vaccine status, subtype, sex and the elapsed time between the last HIV negative test and specimen collection (maximum infection duration) are available at [https://www.hiv.lanl.gov/content/sequence/HIV/SI\\_alignments/set12.html](https://www.hiv.lanl.gov/content/sequence/HIV/SI_alignments/set12.html), where a total of 124 subjects are listed. We selected 116 incident specimens with five or more envelope gene sequences and an HIV-1 infection duration of less than 2 years (Supplementary Table S4).

Collectively, we analyzed a total of 585 incident specimens and 305 chronic specimens of the envelope gene segment, HXB2 7134-7499. Full envelope gene sequences were available from 547 incident and 149 chronic specimens, as marked in Supplementary Tables S1–S4. More than half of the specimens were subtype B (63%), and subtypes A, C, D and recombinants were also represented (4, 16, 1 and 15%, respectively). Sixty seven percent of samples were from male subjects, 27% from female subjects and sex was not reported for the remaining samples. Subjects' HIV-1 infection risk factors were reported to be men sex with men (39%), heterosexual (23%), intravenous drug users (IDU) (5%) or unknown (34%). Around 8% of samples were obtained from ART experienced subjects. The proportion of specimens with viral load less than 1000 copies/ml was 3% and that with CD4+ T cell count less than 200 cells/mm<sup>3</sup> (AIDS) was 3%.

### 2.2 HIITE design

HIITE takes input (five or more) sequences in a fasta format (input sequences are removed when each task is complete) and 'Align' option is available to align sequences using a global alignment algorithm, *Context-Dependent Alignment* (Huang, 1994). HIITE measures the inter-sequence Hamming distance distribution of aligned sequences and calculates the diversity and variance (mean and variance of the Hamming distance distribution). The diversity is given as  $\overline{HD}/N_B$  and variance is  $(\overline{HD^2} - \overline{HD}^2)/N_B$  where

$$\overline{HD} = \frac{2}{N(N-1)} \sum_{i=1}^{N-1} \sum_{j=i+1}^N HD_{ij} \quad (1)$$

$$\overline{HD^2} = \frac{2}{N(N-1)} \sum_{i=1}^{N-1} \sum_{j=i+1}^N HD_{ij}^2 \quad (2)$$

Here  $N_B$  is the length of a sequence,  $N$  is the number of sequences in a specimen and  $HD_{ij}$  is the number of base substitutions (Hamming distance) between sequences  $i$  and  $j$ . Additionally, HIITE measures the genome similarity index (GSI), defined as (Park *et al.*, 2014)

$$GSI_k = \sum_{d=0}^k \left\{ \sum_{i=1}^n \sum_{j=1}^n f_i f_j I(HD_{ij} = d) \right\}, \quad (3)$$

where  $n$  is the number of distinct sequences within a specimen,  $f_i$  ( $f_j$ ) is the frequency of the sequence  $i$  ( $j$ ) and  $I(HD_{ij} = d)$  is an indicator

that it is 1 when the Hamming distance between sequence  $i$  and  $j$  is  $d$  otherwise, 0. An input is classified as chronic when it satisfies the condition of  $\text{diversity} > \theta_{\text{diversity}}$  and  $\text{GSI} < \theta_{\text{GSI}}$  (C1 in Fig. 1B). Otherwise, the input is subject to clustering in order to identify a single lineage from specimens with multiple founder variants. When the ratio between variance and diversity,  $\beta$  is greater than the threshold,  $\theta_{\beta}$ , the hierarchical agglomerative clustering algorithm (from the sklearn.cluster python package) is used to identify a single lineage where  $\beta$  is less than the threshold. The clustering algorithm is expected to identify a single lineage, excluding recombinant strains, if any were detected as separate clusters due to their distances from a major cluster. When the number of sequences within a lineage is too small (for example, less than 4), the major lineage with minimum  $\beta$  is used instead to measure the single lineage diversity. When the single lineage diversity is greater than  $\theta_{\text{diversity}}$  (condition C2 in Fig. 1B), the input is denoted as chronic. Otherwise, the input is classified as incident and the time since infection along with its 95% prediction interval are estimated using the relationship between time since infection and single lineage diversity, as described below. HIITE is available at [www.hayounlee.org/software.html](http://www.hayounlee.org/software.html) and the architecture of HIITE's frontend, backend and database is shown in Supplementary Figure S1.

### 2.3 Mixed effect model and prediction interval

A linear mixed effect model was used to estimate the slope of time since infection against the single lineage diversity. The model equation is

$$t_i(d) = (a + \eta_i)d + (c + \mu_i), \quad (4)$$

where  $t_i(d)$  is subject  $i$ 's time since infection for a given diversity  $d$ ,  $a$  is the population slope between diversity and time since infection,  $c$  is the population intercept and  $a + \eta_i$  and  $c + \mu_i$  are the slope and intercept of subject  $i$ , respectively. The lme4 package in R was used to estimate the model parameters. The 95% prediction interval of time since infection was calculated by resampling data from the fitted linear mixed-effects model using merTools package in R. This interval covers 95% of the resampled points in the diversity-time plane.

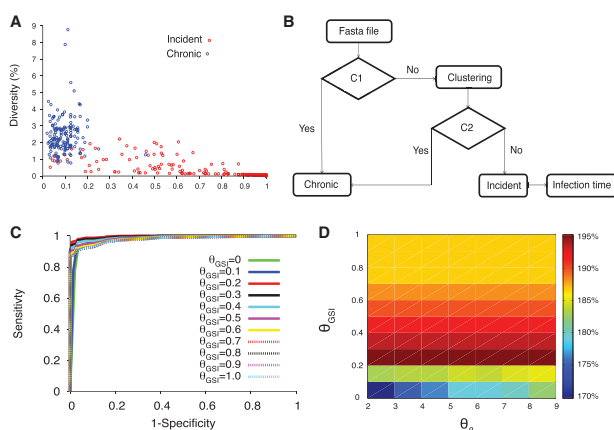

**Fig. 1.** HIITE. (A) GSI and diversity of 252 incident and 144 chronic subjects. The incident subjects were at Fiebig stages I–V and chronic subjects' documented HIV-1 infection periods were longer than 2 years. (B) Flow chart of HIITE: the condition C1 denotes 'diversity  $> \theta_{\text{diversity}}$ ' and 'GSI  $< \theta_{\text{GSI}}$ ', condition C2 denotes 'single lineage diversity  $> \theta_{\text{diversity}}$ '. (C) The ROC curves for  $\theta_{\beta}=7$  and  $\theta_{\text{GSI}}$  ranging from 0 to 1. The area under the ROC curve was maximal (0.997) at  $\theta_{\beta}=7$  and  $\theta_{\text{GSI}}=0.2$  (solid red curve). (D) The sum of sensitivity and specificity in the plane of  $\theta_{\beta}$  and  $\theta_{\text{GSI}}$  (Color version of this figure is available at *Bioinformatics* online.)

## 3 Results

Our goal is to develop a single assay, HIITE, for determining HIV-1 incidence and estimating the time of infection for recently infected individuals. We first considered two metrics: (i) GSI and (ii) diversity. A recent infection was characterized as the presence of sequences with few mutations that was marked by high GSI (Park et al., 2014; 2017). The incidence assay using GSI as a genomic biomarker has demonstrated high precision for HIV incidence assessment, meeting the optimal FRR and MDRI performance standards (Park et al., 2011; 2014; 2017). Additionally, intrahost HIV envelope gene sequences obtained from individuals with a single founder showed linear diversification patterns with quadratic attenuation (Park et al., 2016), demonstrating that the single lineage diversity can be a marker for determining the onset time of an infection.

Figure 1A compared the GSI ( $\text{GSI}_4$ ) and diversity of full envelope gene sequences collected from incident and chronic specimens. We compiled 144 chronic specimens whose documented HIV infection was greater than 2 years, and 252 incident specimens acquired within 2 years of infection, at Fiebig stages I–V (see Section 2 and Supplementary Tables S1 and S2). As expected, the chronic specimens were located at the low GSI and high diversity region (Fig. 1A). Therefore, when a specimen's diversity was greater than  $\theta_{\text{diversity}}$  and GSI less than  $\theta_{\text{GSI}}$ , HIITE labeled it as chronic (Fig. 1B).

Chronic specimens with longer evolution period may have a greater diversity than incident specimens. However, when multiple viruses are transmitted, the sequence diversity of incident specimens can be as high as chronic diversity. As shown in Figure 1A, 33 out of 252 (13.1%) incident specimens' diversity overlapped with the chronic specimens' diversity, suggesting multiple founder infections. To properly assess multiple founder cases, we measured the ratio of variance to diversity,  $\beta$ . At the early infection stage, the Hamming distance distribution of a single founder's descendants was approximately shown to be a Poisson where  $\beta = 1$  (Lee et al., 2009). When  $\beta$  was significantly greater than 1, hierarchical agglomerative clustering was used to identify a single lineage where  $\beta < \theta_{\beta}$ . When the single lineage diversity was greater than  $\theta_{\text{diversity}}$ , the specimen was classified as chronic, otherwise it was classified as incident (Fig. 1B).

Our next step was to determine a set of threshold values that maximize the sum of sensitivity and specificity, provided that specificity was over 99%. The sensitivity is the proportion of incident specimens that HIITE designates as incident and specificity is the fraction of chronic specimens that HIITE identifies as chronic. Note that the optimal incidence assay performance standards require a less than 1% FRR (100%-specificity) (<https://docs.gatesfoundation.org/documents/hiv-incidence-rules-and-guidelines.pdf>). The receiver operating characteristic (ROC) analysis showed that the area under the ROC curve was maximal (0.997) at  $\theta_{\beta}=7$  and  $\theta_{\text{GSI}}=0.2$  (Fig. 1C and Supplementary Fig. S2). With  $\theta_{\beta}=7$  and  $\theta_{\text{GSI}}=0.2$ ,  $\theta_{\text{diversity}}=0.78$  maximized the sum of sensitivity and specificity, given that specificity was over 99%. Figure 1D plots the sum of sensitivity and specificity in the plane of  $\theta_{\beta}$  and  $\theta_{\text{GSI}}$  for  $\theta_{\text{diversity}}=0.78$ . Additionally, we examined the previously published longitudinal specimens from 40 subjects (Supplementary Table S3). Figure 2A plots the single lineage diversity dynamics of this longitudinal sequence data. Here, we used the time interval and increase in single lineage diversity from each subject's first sample to remove infection time uncertainty. As expected, the diversity increase was highly correlated with days from first sample (Fig. 2A). The correlation coefficient was maximal at  $\theta_{\beta}=7$  (Fig. 2B). Figure 2C plots the single lineage distribution of the 252 incident

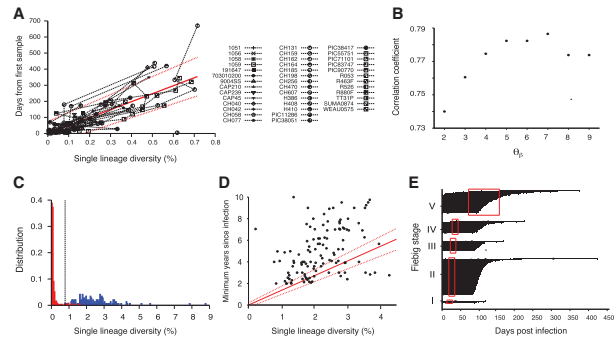

**Fig. 2.** HIITE analysis of full envelope gene sequences. **(A)** Single lineage diversity dynamics of longitudinal incident specimens from 40 subjects in [Supplementary Table S3](#), who were followed since their first sample, which was taken within 6 months of infection. To remove uncertainty in the timing of infection, the sampling time interval and increase in the single lineage diversity from each subject’s first sample were used. The best fit (solid red line) of the mixed-effects model to the single lineage diversity dynamics is presented along with the 95% prediction interval (dotted red lines). **(B)** Spearman correlation coefficient between the single lineage diversity difference and time difference for the 40 longitudinally followed subjects in [Figure 2A](#). The correlation coefficient was maximal at  $\theta_\beta = 7$ . **(C)** With thresholds  $\theta_\beta = 7$ ,  $\theta_{\text{GSI}} = 0.2$ , and  $\theta_{\text{diversity}} = 0.79$ , the single lineage diversity distributions of the 252 incident (red) and 144 chronic (blue) specimens resulted in a sensitivity of 96.0% and specificity of 99.3%. **(D)** The single lineage diversity of 144 chronic specimens is plotted along with each specimen’s minimum documented duration of infection. Around 85% of chronic specimens are located outside the 95% prediction interval in [Figure 2A](#), violating the linear relationship between diversity and infection time. **(E)** HIITE estimated time since infection of Fiebig stage I–V samples. Among the 252 early infected subjects in Fiebig stages I–V, 12 subjects were misclassified as chronic and excluded. Each individual’s time since infection estimate (black circles), along with 95% prediction interval (black lines), is plotted against the 95% confidence interval for days post infection at each Fiebig stage (red boxes). Subjects at Fiebig stages I/II and II/III were grouped as II and III, respectively. The correlation between Fiebig stage and our estimate was statistically significant (Spearman’s correlation coefficient  $\rho = 0.44$ ,  $P < 0.001$ ) (Color version of this figure is available at [Bioinformatics online](#).)

and 144 chronic specimens with  $\theta_\beta = 7$ ,  $\theta_{\text{GSI}} = 0.2$  and  $\theta_{\text{diversity}} = 0.78$ , resulting in a sensitivity of 96.0% and specificity of 99.3%.

To estimate incident specimens’ infection time, we used a mixed effects model to measure the slope of the single lineage diversity dynamics in [Figure 2A](#) (see Section 2). The solid red line in [Figure 2A](#) denotes the best fit of the linear mixed effects model for longitudinal specimens from 40 subjects. Additionally, to quantify individual sample variability in the diversity-time relationship, we generated a 95% prediction interval from the mixed-effects model, which covers 95% of the data points in the diversity-time plane ([Fig. 2A](#)). For example, the single lineage diversity of 0.3% denotes 148 days from infection with the 95% prediction interval of [55–242] days.

Next, we attempted to address whether the mixed effects model fit also holds at chronic stages. The chronic specimens significantly deviated from the 95% prediction interval of the single lineage diversity dynamics where 85% of chronic specimens lied outside of the band ([Fig. 2D](#)). The majority of the chronic specimens’ diversity was smaller than the projected diversity from incident stages. This observation suggests that the linear relationship between diversity and infection time is not valid for long-standing infections. Therefore, HIITE designated the stage of infection to be either chronic or incident and estimated the time of infection for those recent subjects.

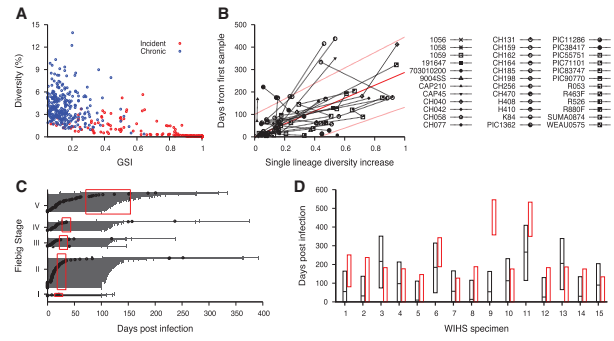

**Fig. 3.** HIITE analysis of HXB2 7134-7499 segment sequences. **(A)** GSI and diversity of HXB2 7134-7499 segment specimens obtained from 283 incident and 297 chronic subjects in [Supplementary Table S1 and S2](#). **(B)** Single lineage diversity increase and days from first sample for the 36 longitudinal subjects in [Supplementary Table S3](#). The best fit (solid red line) of the mixed-effects model to the single lineage diversity dynamics is presented along with the 95% prediction interval (dotted red lines). **(C)** HIITE estimated time since infection of 223 Fiebig stage I–V samples. Each individual’s time since infection estimate (black circles) and its 95% prediction interval (black lines) are plotted against the 95% confidence interval for days post infection at each Fiebig stage (red boxes). The 95% prediction intervals of all but four specimens overlapped with Fiebig stage 95% confidence intervals. The correlation between Fiebig stage and our estimate was statistically significant (Spearman’s correlation coefficient  $\rho = 0.31$ ,  $P < 0.001$ ). **(D)** HIITE’s time since infection estimates (black horizontal lines) and 95% prediction intervals (black boxes) for 15 WIHS specimens classified as incident. The infection time intervals obtained from each specimen’s HIV-1 negative and positive test dates are plotted by red boxes. HIITE estimates overlapped with all specimens’ documented infection time intervals, except for specimen 9. WIHS specimen 1 is from subject TY2947, 2 from JG8930, 3 from JY3080, 4 from SS0342, 5 and 6 from RH7057, 7 from VE6375, 8 and 9 from EJ7211, 10 from TI9054, 11 and 12 from GE6106, 13 from OY9080, 14 from DA1342, and 15 from SI1392 ([Supplementary Table S2](#)) (Color version of this figure is available at [Bioinformatics online](#).)

To cross-validate HIITE’s mixed-effect model estimates regarding time since infection, we used 252 incident specimens in Fiebig stages I–V in [Supplementary Table S2](#). We compared HIITE’s time since infection estimates to Fiebig stage estimates. HIITE correctly classified 240 specimens as incident and all these specimens’ 95% prediction interval, except for one, overlapped with their respective Fiebig stage’s 95% confidence interval. [Figure 2E](#) showed the estimated time since infection with the 95% prediction interval grouped in Fiebig stages I–V. Additionally, the correlation between Fiebig stage estimates and our estimates was statistically significant (Spearman’s correlation coefficient  $\rho = 0.44$ ,  $P < 0.001$ ).

To examine HIITE’s viability in a resource-limited setting, we evaluated its performance using an envelope gene segment (~400 nucleotide base long). The genomic assay’s applicability for routine use in cross-sectional surveys can be maximized by utilizing next-generation sequencing platforms that are optimized for 300–500 base long sequencing ([Park et al., 2014](#)). We compiled 11 577 envelope gene segments (HXB2 7134-7499) of 297 chronic and 283 incident specimens ([Supplementary Tables S1 and S2](#)). As observed in the full envelope gene analysis in [Figure 1A](#), the chronic and incident specimens showed a disparity in the plane of  $\text{GSI}_1$  and diversity ([Fig. 3A](#)). With  $\theta_\beta = 14$ ,  $\theta_{\text{GSI}} = 0.45$  and  $\theta_{\text{diversity}} = 0.96$ , the 297 chronic and 283 incident specimens showed 84.1% sensitivity and 99.3% specificity. The HXB2 7134-7499 segment estimated a shorter time since infection than that of the full envelope gene, for a given single lineage diversity. For instance, when the segment’s diversity was 0.3%, time since infection was estimated to be 86 days, whereas the full envelope gene estimate was 148 days. This can be



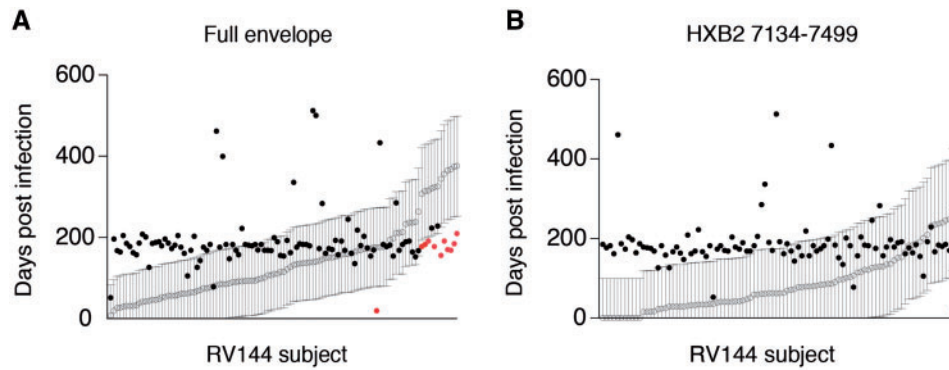

**Fig. 4.** HIITE's performance on vaccinated subjects and placebo recipients of RV144 vaccine trial. (A) HIITE estimated the time since infection (open circle) and 95% prediction interval (black line) for 109 RV144 trial participants who are denoted as incident by HIITE. Days from each subject's HIV negative test date is marked by a filled black or red circle. Circles in red indicate cases which fell outside of the predicted interval. Out of the 109 subjects, 11 subjects' 95% prediction interval was located outside each subject's documented maximum duration of infection (marked by red dots). (B) The segment HXB2 7134-7499-based estimates on time since infection (open circle) with 95% prediction interval (black line) for the 96 RV144 vaccine trial participants HIITE classified as incident. Each subject's days from last HIV-1 negative sample is denoted by a filled circle (Color version of this figure is available at *Bioinformatics* online.)

**Table 1.** HIITE performance

|                                           | Full envelope (547 incident and 149 chronic) | HXB2 7134-7499 (585 incident and 305 chronic) |
|-------------------------------------------|----------------------------------------------|-----------------------------------------------|
| FRR                                       | 0.67% [0%–2.0%]                              | 0.66% [0%–2.0%]                               |
| MDRI                                      | 492 [404–582] days                           | 358 [312–418] days                            |
| Sensitivity                               | 94.0% [92.0%–95.8%]                          | 83.1% [80.0%–86.0%]                           |
| Prediction error for time since infection | 13.5% [10.8%–16.5%]                          | 19.8% [16.6%–23.1%]                           |

explained from the fact that the segment encompasses V3 and V4 loops and thus presents a greater level of diversification in a given evolution time, as compared to the full envelope gene. In addition, the HXB2 7134-7499 segment presented a wider 95% prediction band than the full envelope analysis (Figs. 2A and 3B).

The correlation coefficient between Fiebig stage estimates and HIITE estimates was 0.31 ( $P < 0.001$ ) for the HXB2 7134-7499 segment. The 95% prediction intervals of all but four incident specimens overlapped with Fiebig stage 95% confidence intervals (Fig. 3C). Only one out of 15 WIHS specimens classified as incident showed a deviation from the documented infection time interval (Fig. 3D). In summary, more incident specimens were misclassified when HIITE used the HXB2 7134-7499 segment rather than full envelope gene, resulting in reduced sensitivity (84.1% versus 96.0%). However, HIITE's time since infection estimate remained highly consistent with Fiebig stage and documented infection duration.

HIITE's performance was further cross validated with specimens collected from an HIV vaccine trial. HIITE was applied to 49 vaccinee and 67 placebo participants of the RV144 trial (Rolland et al., 2012). Having the records of each subject's last HIV-1 negative test date permitted us to examine whether the HIITE prediction conformed to this record (Fig. 4A). Using full envelope gene sequences, our assay classified 7 out of 116 incident subjects as chronic. This resulted in 94% sensitivity (Supplementary Fig. S3), which is in agreement with the 96% sensitivity measured from the 252 incident specimens in Supplementary Table S2. We exemplified a subject with two founder variants, which HIITE successfully clustered as two different lineages (Supplementary Fig. S4). The 95% prediction interval of 11 subjects' estimated time of infection was located outside each subject's maximum duration of infection (Fig. 4A). By adding 7 subjects who were misclassified as chronic to

these 11 subjects, the prediction error for time since infection was 16% (Supplementary Fig. S3).

Next, we further examined the seven cases that HIITE misclassified as chronic. As depicted in Supplementary Figure S5, these subjects showed high level of diversity resulting in chronic classification. Although subject AA037 showed a pattern of multiple founder variants, HIITE did not perform clustering on this specimen since it was classified as chronic by condition 1, C1 in Figure 1B. Our assay was tuned to provide less than 1% FRR (over 99% specificity) in order to avoid extraneous clustering, which would have misclassified chronic samples as incident.

We next compared vaccinated subjects with placebo recipients of the RV144 trial. We found no differences among their maximum infection duration (Wilcoxon rank sum test,  $P = 0.57$ ), diversity ( $P = 0.19$ ), GSI ( $P = 0.21$ ) and variance ( $P = 0.40$ ). When we compared 48 vaccinated subjects with 61 placebo subjects classified as incident, time since infection provided by HIITE also did not differ ( $P = 0.58$ ).

Figure 4B showed HIITE's prediction of time since infection for 96 RV144 trial participants classified as recent, using HXB2 7134-7499 segment. This segment showed 83% sensitivity and 18% prediction error for time since infection (Supplementary Fig. S3). These segment-based time since infection estimates were significantly correlated with the full envelope gene-based estimates (Spearman's correlation coefficient  $\rho = 0.56$ ,  $P < 0.001$ ), as shown in Supplementary Figure S3.

Table 1 summarized the overall performance of HIITE using all incident and chronic specimens examined in this study. For the full envelope gene, 547 incident specimens and 149 chronic specimens showed a FRR of 0.67% [0%–2.0%], MDRI of 492 [404–582] days, sensitivity of 94.0% [92.0%–95.8%] and prediction error for time since infection of 13.5% [10.8%–16.5%]. For the envelope gene segment HXB2 7134-7499, 585 incident specimens and 305

chronic specimens showed a FRR of 0.66% [0%–2.0%], MDRI of 358 [312–418] days, sensitivity of 83.1% [80.0%–86.0%] and prediction error for time since infection of 19.8% [16.6%–23.1%]. Additionally, we conducted k-fold cross validation by dividing all the incident and chronic specimens into four subsets, respectively. To clearly separate out test data from training set, one of the four sub-sets was used as the test data and the other three were used as the training set for HIITE. We repeated this process such that each subset was independently used as the test data. [Supplementary Table S5](#) shows the algorithm performance averaged over the four test sets. HIITE is available as an online web tool, and its web interface, backend workflow and data processing are presented in Section 2 and [Supplementary Figure S1](#).

The 95% confidence intervals were obtained by sampling specimens with replacement.

## 4 Discussion

We developed a single assay, HIITE, to detect incident infections and estimate days post infection. HIITE's innovation is implementing the metrics of HIV-1 envelope gene sequences in order to concurrently inform the stage of infection and time since infection for incident cases. The precision of HIITE is unprecedented, meeting optimal incidence assay performance standards of less than 1% of FRR and 1 year of MDRI. HIITE achieved a sensitivity of 94% (full envelope gene) and 83% (HXB2 7134-7499 segment). This high level of precision was achieved by estimating the single lineage diversity of specimens originating from multiple founder variants.

HIITE takes empirical approaches to estimate time since infection from one individual's HIV-1 envelope gene sequence population. The main driving force for HIV diversification is random errors made by viral reverse transcriptase (Mansky and Temin, 1995). In addition, heavy immune pressure (Boutwell *et al.*, 2010; Liao *et al.*, 2013; McMichael *et al.*, 2010; Richman *et al.*, 2003), viral recombination and APOBEC3G/F-mediated hypermutation (Simon *et al.*, 2005) collectively contribute to heterogeneous HIV diversification patterns, resulting in variable evolution rates across individuals. A mixed effects model was used to properly assess the variation of the relationship between viral diversity and time of infection across individuals.

HIITE's design and validation were formulated by congregating diverse HIV-1 sequences from global cohorts from Africa, America, Asia and Europe. These global cohorts represented a diverse array of subtypes, risk behaviors, viral loads and CD4 T cell counts. In the designing step, HIITE's algorithm and parameters were determined by examining hundreds of documented incident and chronic specimens. HIITE was then validated with specimens previously collected from RV144 vaccine trial participants. These globally accumulated HIV-1 sequence datasets enabled us to develop a single assay that simultaneously estimates HIV-1 incidence and infection time, which is available to the public via a web-based software application.

One of HIITE's advantages is providing the epidemic's valuable information at the population level and at the individual level. At the population level, precise incidence assessment strengthens epidemic monitoring efforts and guides strategy optimization for prevention and intervention programs. Once HIITE measures the number of individuals classified as incident and chronic from a cross-sectional survey, the rate of incidence is determined as a function of these measures and the assay's FRR and MDRI (Kassanjee *et al.*, 2012). At the individual level, revealing the timing of HIV-1 transmission facilitates optimal clinical management, including

ART initiation, risk behavior assessment and further transmission prevention. Additionally, infection time estimates can be used to identify key populations largely responsible for epidemic spread (Peitzmeier *et al.*, 2015) and thereby infer HIV-1 transmission clusters. This in-depth epidemic illustration allows us to discover detailed geographic and demographic factors of HIV-1 transmission chains.

HIITE faces considerable challenges for its routine-use in cross-sectional surveys. First, it is not viable to sequence plasma specimens from virally suppressed ART subjects and elite controllers. Thus, an alternative algorithm such as proviral DNA sequencing can be sought to isolate genomic signatures. Second, incidence determination at the population level requires additional epidemic considerations as the assay performance may vary across different subpopulations. For instance, HIITE's sensitivity regarding viral subtype needs to be examined with more diverse subtype specimens. The majority of our incidence specimens (~97.5%) were obtained within 1 year of infection. Inclusion of more late-recent specimens collected from 1 to 2 years since infection can potentially result in the decrease of HIITE's sensitivity. Third, assay-specific factors, including cost and regulatory requirements, ought to be evaluated as a pre-requisite for HIITE to be employed in cross-sectional surveillance. To reduce sequencing cost, next-generation sequencing methods can be implemented. In order to minimize sequencing errors of long-read next-generation sequencing methods, unique barcodes can be assigned to each HIV-1 cDNA template prior to PCRs and obtain a consensus sequence from the reads with the same barcode (Kivioja *et al.*, 2012).

HIITE is the first assay to simultaneously inform two key metrics, HIV-1 incidence and infection time, in a highly precise manner. HIITE suggests a potential paradigm shift from host signal-based surveys to viral signal-based surveys, advancing HIV-1 prevention/intervention efforts.

## Acknowledgements

We thank Dr. James Mullins (supported by P30AI027757) for providing the published sequence data from the RV144 trial. We thank Victoria Seraphim and Emily Johnson for reviewing this manuscript.

## Funding

This work has been supported by the National Institutes of Health: National Institute of Allergy and Infectious Diseases [grant nos. R01 AI095066 and AI083115].

*Conflict of Interest:* none declared.

## References

- Boutwell, C.L. *et al.* (2010) Viral evolution and escape during acute HIV-1 infection. *J. Infect. Dis.*, **202**(Suppl 2), S309–S314.
- Brenner, B.G. *et al.* (2011) Transmission clustering drives the onward spread of the HIV epidemic among men who have sex with men in Quebec. *J. Infect. Dis.*, **204**, 1115–1119.
- Brookmeyer, R. (1991) Reconstruction and future trends of the AIDS epidemic in the United States. *Science*, **253**, 37–42.
- Busch, M.P. *et al.* (2010) Beyond detuning: 10 years of progress and new challenges in the development and application of assays for HIV incidence estimation. *AIDS*, **24**, 2763–2771.
- Cousins, M.M. *et al.* (2012) Comparison of a high-resolution melting assay to next-generation sequencing for analysis of HIV diversity. *J. Clin. Microbiol.*, **50**, 3054–3059.

- Edlefsen, P.T. et al. (2015) Comprehensive sieve analysis of breakthrough HIV-1 sequences in the RV144 vaccine efficacy trial. *PLoS Comput. Biol.*, **11**, e1003973.
- Fiebig, E.W. et al. (2003) Dynamics of HIV viremia and antibody seroconversion in plasma donors: implications for diagnosis and staging of primary HIV infection. *AIDS*, **17**, 1871–1879.
- Huang, X. (1994) A context dependent method for comparing sequences. In: Crochemore, M. and Gusfield, D. (ed.) *Combinatorial Pattern Matching. CPM 1994. Lecture Notes in Computer Science*. Springer, Berlin, Heidelberg, pp. 54–63.
- Incidence Assay Critical Path Working Group. (2011) More and better information to tackle HIV epidemics: towards improved HIV incidence assays. *PLoS Med.*, **8**, e1001045.
- Janes, H. et al. (2015) HIV-1 infections with multiple founders are associated with higher viral loads than infections with single founders. *Nat. Med.*, **21**, 1139–1141.
- Kassanjee, R. et al. (2012) A new general biomarker-based incidence estimator. *Epidemiology*, **23**, 721–728.
- Kassanjee, R. et al. (2014) Independent assessment of candidate HIV incidence assays on specimens in the CEPHIA repository. *AIDS*, **28**, 2439–2449.
- Kassanjee, R. et al. (2016) Viral load criteria and threshold optimization to improve HIV incidence assay characteristics. *AIDS*, **30**, 2361–2371.
- Keating, S.M. et al. (2016) Performance of the Bio-Rad Geenius HIV1/2 supplemental assay in detecting 'recent' HIV infection and calculating population incidence. *J. Acquir. Immune Defic. Syndr.*, **73**, 581–588.
- Keele, B.F. et al. (2008) Identification and characterization of transmitted and early founder virus envelopes in primary HIV-1 infection. *Proc Natl Acad Sci USA*, **105**, 7552–7557.
- Kivioja, T. et al. (2012) Counting absolute numbers of molecules using unique molecular identifiers. *Nat. Methods*, **9**, 72–U183.
- Lee, H.Y. et al. (2009) Modeling sequence evolution in acute HIV-1 infection. *J. Theor. Biol.*, **261**, 341–360.
- Liao, H.X. et al. (2013) Co-evolution of a broadly neutralizing HIV-1 antibody and founder virus. *Nature*, **496**, 469–476.
- Love, T.M. et al. (2016) SPMM: estimating infection duration of multivariant HIV-1 infections. *Bioinformatics*, **32**, 1308–1315.
- Mansky, L.M. and Temin, H.M. (1995) Lower in vivo mutation rate of human immunodeficiency virus type 1 than that predicted from the fidelity of purified reverse transcriptase. *J. Virol.*, **69**, 5087–5094.
- Mastro, T.D. (2013) Determining HIV incidence in populations: moving in the right direction. *J. Infect. Dis.*, **207**, 204–206.
- McMichael, A.J. et al. (2010) The immune response during acute HIV-1 infection: clues for vaccine development. *Nat. Rev. Immunol.*, **10**, 11–23.
- Moyo, S. et al. (2016) Analysis of viral diversity in relation to the recency of HIV-1C infection in Botswana. *PLoS One*, **11**, e0160649.
- Park, S.Y. et al. (2011) Designing a genome-based HIV incidence assay with high sensitivity and specificity. *AIDS*, **25**, F13–F19.
- Park, S.Y. et al. (2014) Developing high-throughput HIV incidence assay with pyrosequencing platform. *J. Virol.*, **88**, 2977–2990.
- Park, S.Y. et al. (2016) Molecular clock of HIV-1 envelope genes under early immune selection. *Retrovirology*, **13**, 38.
- Park, S.Y. et al. (2017) The HIV genomic incidence assay meets false recency rate and mean duration of recency infection performance standards. *Sci. Rep.*, **7**, 7480.
- Peitzmeier, S.M. et al. (2015) Associations of stigma with negative health outcomes for people living with HIV in the Gambia: implications for key populations. *J. Acquir. Immune Defic. Syndr.*, **68**(Suppl 2), S146–S153.
- Fuller, V. et al. (2017) Estimating time of HIV-1 infection from next-generation sequence diversity. *PLoS Comput. Biol.*, **13**, e1005775.
- Ragonnet-Cronin, M. et al. (2012) Genetic diversity as a marker for timing infection in HIV-infected patients: evaluation of a 6-month window and comparison with BED. *J. Infect. Dis.*, **206**, 756–764.
- Richman, D.D. et al. (2003) Rapid evolution of the neutralizing antibody response to HIV type 1 infection. *Proc Natl Acad Sci USA*, **100**, 4144–4149.
- Rolland, M. et al. (2012) Increased HIV-1 vaccine efficacy against viruses with genetic signatures in Env V2. *Nature*, **490**, 417–420.
- Simon, V. et al. (2005) Natural variation in *Vif*: differential impact on APOBEC3G/3F and a potential role in HIV-1 diversification. *PLoS Pathog.*, **1**, e6–0028.
- Wu, J.W. et al. (2015) A generalized entropy measure of within-host viral diversity for identifying recent HIV-1 infections. *Medicine (Baltimore)*, **94**, e1865.
